# Supplementary material for: Bioremoval of Yttrium (III), Cerium (III), Europium (III), and Terbium (III) from Single and Quaternary Aqueous Solutions Using the Extremophile Galdieria sulphuraria (Galdieriaceae, Rhodophyta)
Source: MDPI journal article supplement (doi:10.3390/plants11101376), 2022-05-22
Supplement: s1 [file s1]

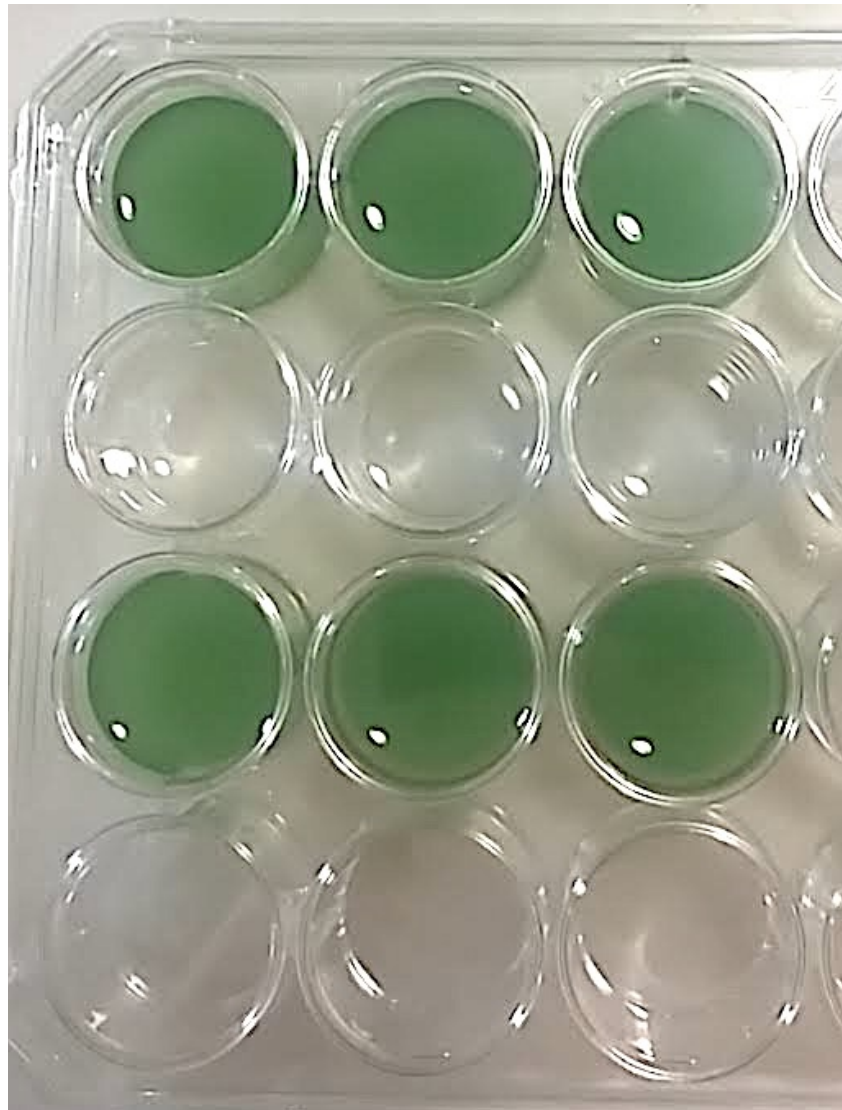

Figure S1. Example of the triplicates of treated and untreated samples (green wells) in 24-wells plates. The plates were kept on a rotary shaker at 37°C for 24 hours. Transparent wells contained 2 mL metal solutions set up as positive control.
