# Supplementary material for: Bioremoval of Yttrium (III), Cerium (III), Europium (III), and Terbium (III) from Single and Quaternary Aqueous Solutions Using the Extremophile Galdieria sulphuraria (Galdieriaceae, Rhodophyta)
Source: MDPI journal article supplement (doi:10.3390/plants11101376), 2022-05-22
Supplement: s1 [file s1]

**Table S2.** Total metal removed from single and quaternary metal aqueous solutions by *G. sulphuraria*, strain ACUF 427. Data are expressed as  $\mu\text{mol/g}$  dry matter. The total metal removed quantities were calculated by adding the amount of every metal component ( $\text{Y}^{3+} + \text{Ce}^{3+} + \text{Eu}^{3+} + \text{Tb}^{3+}$ ).

| Total metal removed<br>( $\mu\text{mol/g dm}$ ) | Metal<br>system | pH 2.5 |            | pH 3.5 |            | pH 4.5 |            | pH 5.5 |            |
|-------------------------------------------------|-----------------|--------|------------|--------|------------|--------|------------|--------|------------|
|                                                 |                 | Single | Quaternary | Single | Quaternary | Single | Quaternary | Single | Quaternary |
|                                                 | Y3+             | 22.43  | 5.08       | 20.13  | 3.56       | 28.36  | 4.92       | 25.25  | 4.58       |
|                                                 | Ce3+            | 20.98  | 5.16       | 25.08  | 3.92       | 29.82  | 7.64       | 42.60  | 6.59       |
|                                                 | Eu3+            | 23.49  | 10.01      | 24.66  | 8.47       | 36.78  | 15.17      | 42.91  | 13.50      |
|                                                 | Tb3+            | 22.26  | 11.47      | 24.14  | 9.02       | 40.58  | 15.20      | 34.24  | 13.74      |
|                                                 | Total metals    | /      | 31.72      | /      | 24.96      | /      | 42.93      | /      | 38.41      |
