# Supplementary material for: Bioremoval of Yttrium (III), Cerium (III), Europium (III), and Terbium (III) from Single and Quaternary Aqueous Solutions Using the Extremophile Galdieria sulphuraria (Galdieriaceae, Rhodophyta)
Source: MDPI journal article supplement (doi:10.3390/plants11101376), 2022-05-22
Supplement: s1 [file s1]

**Table S1.** Total metal removed from single and quaternary metal aqueous solutions by *G. sulphuraria*, strain SAG 107.79. Data are expressed as  $\mu\text{mol/g}$  dry matter. The total metal removed quantities were calculated by adding the amount of every metal component ( $\text{Y}^{3+} + \text{Ce}^{3+} + \text{Eu}^{3+} + \text{Tb}^{3+}$ ).

| Total metal removed<br>( $\mu\text{mol/g dm}$ ) | Metal system | pH 2.5 |            | pH 3.5 |            | pH 4.5 |            | pH 5.5 |            |
|-------------------------------------------------|--------------|--------|------------|--------|------------|--------|------------|--------|------------|
|                                                 |              | Single | Quaternary | Single | Quaternary | Single | Quaternary | Single | Quaternary |
|                                                 | Y3+          | 0.39   | 0.17       | 0.83   | 0.23       | 4.75   | 1.56       | 10.44  | 1.75       |
|                                                 | Ce3+         | 0.41   | 0.15       | 1.08   | 0.33       | 5.94   | 2.09       | 10.97  | 3.11       |
|                                                 | Eu3+         | 0.42   | 0.16       | 1.44   | 0.76       | 10.82  | 6.21       | 14.34  | 6.99       |
|                                                 | Tb3+         | 0.40   | 0.19       | 1.22   | 0.62       | 10.85  | 5.69       | 11.13  | 6.43       |
| Total metals                                    |              | /      | 0.66       | /      | 1.93       | /      | 15.56      | /      | 18.28      |
